# Supplementary material for: Expanding the CRISPR Toolbox with ErCas12a in Zebrafish and Human Cells
Source: PubMed Central journal article supplement (PMC6919245; doi:10.1089/crispr.2019.0026), 2019-12-16
Supplement: Supp_Fig2.pdf [file Supp_Fig2.pdf]

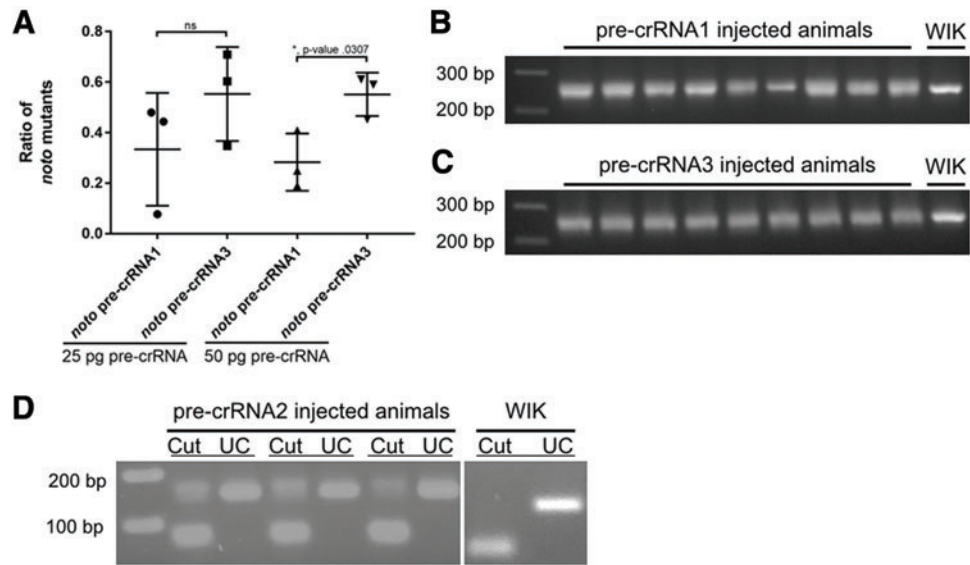

**SUPPLEMENTARY FIG. S2.** Qualitative representation of ErCas12a activity in zebrafish embryos. **(A)** Data plots showing ratio of injected animals displaying somatic *noto* phenotype. Data plot represents the mean  $\pm$  SD. *p*-Values calculated with one-tailed Student's *t*-test. **(B and C)** Gel showing heteroduplex mobility shift of injected animals versus wild type (WIK) for pre-crRNA1 and pre-crRNA3 at *noto*. **(D)** RFLP analysis showing pre-crRNA2 is active at *cx43.4*.
