# Supplementary material for: Expanding the CRISPR Toolbox with ErCas12a in Zebrafish and Human Cells
Source: PubMed Central journal article supplement (PMC6919245; doi:10.1089/crispr.2019.0026), 2019-12-16
Supplement: Supp_Fig5.pdf [file Supp_Fig5.pdf]

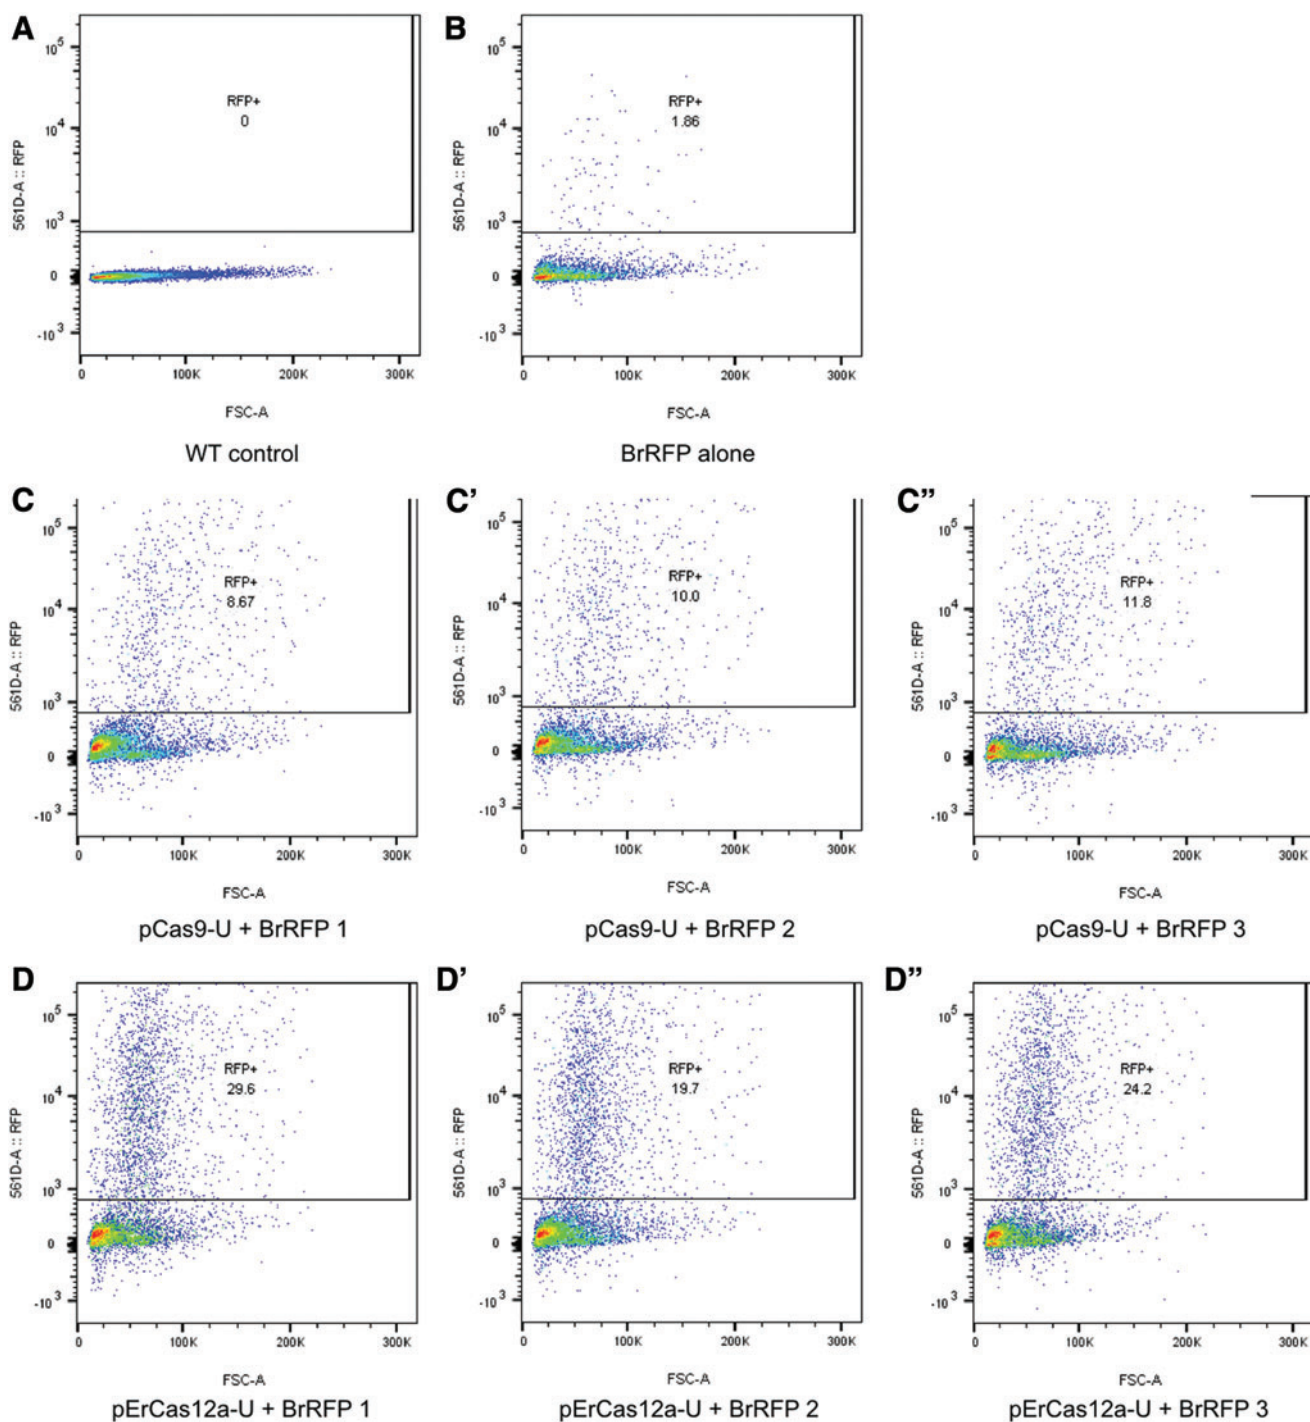

**SUPPLEMENTARY FIG. S5.** Raw data for flow cytometry of RFP-DR48 in HEK293T cells. **(A)** Untransfected HEK293T cells. **(B)** HEK293T cells transfected with pMini-CAAGs::RFP-DR48. **(C-C'')** HEK293T cells transfected with SpCas9-UgRNA and pMini-CAAGs::RFP-DR48. **(D-D'')** HEK293T cells transfected with ErCas12a-pre-U-crRNA. The RFP plots shown were gated on the single-cell population. All measurements taken using excitation of 584 nm and emission of 607 nm.
